# Supplementary material for: Safe Farming: Ultrafine Bubble Water Reduces Insect Infestation and Improves Melon Yield and Quality
Source: MDPI journal article supplement (doi:10.3390/plants13040537), 2024-02-16
Supplement: s1 [file s1]

**Supplementary data:**

Supplementary Table S1. List of primers used in this study.

| Gene           | Forward primer        | Reverse primer           | Accession No. |
|----------------|-----------------------|--------------------------|---------------|
| <i>β-Actin</i> | CCTGGTATCGCTGACCGTAT  | TACTGAGCGATGCAAGGATG     | MELO3C023264  |
| <i>ADP</i>     | ATATTGCCAACAAGGCGTAGA | TGCCCCGTAAACAAGGGATAAA   | MELO3C023630  |
| <i>GL2</i>     | TTAATCAATAATCCCACCGCC | CGGCTCAGAGTTATCACTACAGCT | MELO3C024256  |
| <i>JAZ</i>     | CAGCCCTCAAAGCCAACAAC  | CTCTGAGGTCTCGCTTTCG      | MELO3C006046  |
| <i>JMT</i>     | GGGCCCAACACGTTACTTCT  | AAGACGTCGATGGAACTCGG     | MELO3C003803  |

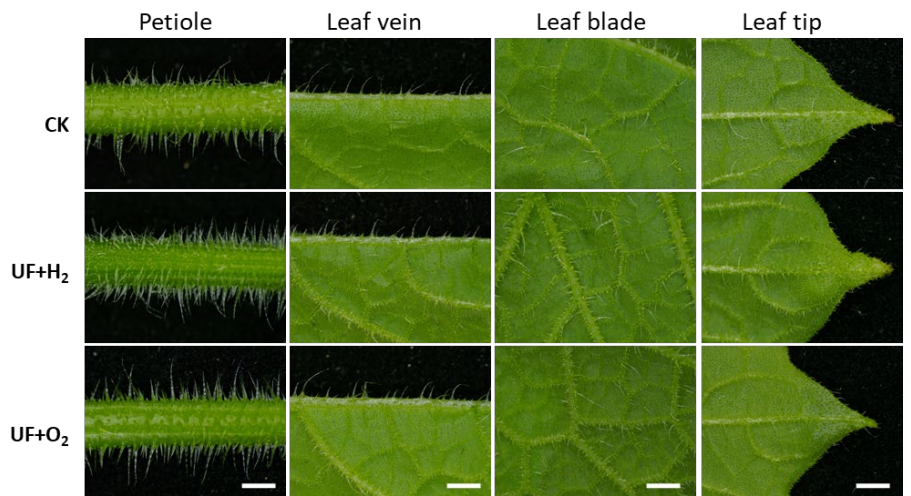

Figure S1. Morphology of trichomes in different tissues of melon after ultrafine water irrigation. The morphology of trichome development after melons were irrigated with ultrafine water enrichment of hydrogen (UF+H<sub>2</sub>), oxygen (UF+O<sub>2</sub>), and RO water control. Scale bar, 2 mm.
